**Other Sedative Medications:** Prescription medications likely to cause clinically important sedating effects that are more often prescribed for non-sleep related indications.

**A**

acetaminophen/butalbital  
 acetaminophen/butalbital/caffeine  
 acetaminophen/butalbital/caffeine/codeine  
 acetaminophen/caffeine/chlorpheniramine maleate/  
 hydrocodone/phenylephrine  
 acetaminophen/caffeine/dihydrocodeine  
 acetaminophen/chlorpheniramine/phenylephrine/  
 phenyltoloxamine  
 acetaminophen/codeine  
 acetaminophen/dichloralphenazone/isometheptene  
 acetaminophen/hydrocodone  
 acetaminophen/oxycodone  
 acetaminophen/pentazocine  
 acetaminophen/phenyltoloxamine  
 acetaminophen/propoxyphene  
 acetaminophen/tramadol  
 acetylcarbromal  
 acrivastine/pseudoephedrine  
 alprazolam  
 aminophylline/amobarbital/ephedrine  
 aminophylline/ephedrine/phenobarbital/potassium iodide  
 aminophylline/ephedrine/guaifenesin/phenobarbital  
 amitriptyline/chlordiazepoxide  
 anhydrous calcium iodide/codeine  
 aripiprazole  
 aspirin/butalbital  
 aspirin/butalbital/caffeine  
 aspirin/butalbital/caffeine/codeine  
 aspirin/caffeine/orphenadrine  
 aspirin/carisoprodol  
 aspirin/hydrocodone  
 aspirin/methocarbamol  
 aspirin/oxycodone  
 atropine/hyoscyamine/phenobarbital/scopolamine  
 atropine/phenobarbital

**B**

baclofen  
 belladonna  
 belladonna/butabarbital  
 belladonna/caffeine/ergotamine/pentobarbital  
 belladonna/ergotamine/phenobarbital  
 belladonna/opium  
 betamethasone/indomethasone/methocarbamol  
 biperiden  
 bromazepam  
 brompheniramine  
 brompheniramine/carbetapentane/phenylephrine  
 brompheniramine/codeine/phenylpropanolamine  
 brompheniramine/dextromethorphan/guaifenesin/phenylephrine  
 brompheniramine/dextromethorphan/guaifenesin/  
 pseudoephedrine

brompheniramine/dextromethorphan/phenylephrine  
 brompheniramine/dextromethorphan/phenylpropanolamine  
 brompheniramine/dextromethorphan/pseudoephedrine  
 brompheniramine/diphenhydramine/phenylephrine  
 brompheniramine/hydrocodone/phenylephrine  
 brompheniramine/hydrocodone/pseudoephedrine  
 brompheniramine/phenylephrine  
 brompheniramine/phenylpropanolamine  
 brompheniramine/pseudoephedrine  
 buprenorphine/naloxone  
 buspirone  
 butabarbital  
 butabarbital/hyoscyamine/phenazopyridine  
 butalbital

**C**

cannabis  
 carbamazepine  
 carbetapentane/chlorpheniramine  
 carbetapentane/chlorpheniramine maleate/ephedrine/  
 phenylephrine  
 carbetapentane/chlorpheniramine/phenylephrine  
 carbetapentane/phenylephrine/pyrilamine  
 carbinoxamine  
 carbinoxamine/dextromethorphan/pseudoephedrine  
 carbinoxamine/hydrocodone/pseudoephedrine  
 carbinoxamine/pseudoephedrine  
 carisoprodol  
 chlordiazepoxide  
 chlordiazepoxide-clidinium  
 chlordiazepoxide-methscopolamine  
 chlormezanone  
 chlorphenesin  
 chlorpheniramine  
 chlorpheniramine/codeine/pseudoephedrine  
 chlorpheniramine/dextromethorphan/guaifenesin/  
 phenylephrine  
 chlorpheniramine/dextromethorphan/phenylephrine  
 chlorpheniramine/dextromethorphan/pseudoephedrine  
 chlorpheniramine/dihydrocodeine/phenylephrine  
 chlorpheniramine/hydrocodone  
 chlorpheniramine/hydrocodone/phenylephrine  
 chlorpheniramine/hydrocodone/pseudoephedrine  
 chlorpheniramine/methscopolamine/phenylephrine  
 chlorpheniramine/methscopolamine/pseudoephedrine  
 chlorpheniramine/phenylephrine  
 chlorpheniramine/phenylephrine/phenylpropanolamine/  
 phenyltoloxamine  
 chlorpheniramine/phenylephrine/phenyltoloxamine  
 chlorpheniramine/phenylephrine/pyrilamine  
 chlorpheniramine/pseudoephedrine  
 chlorpromazine  
 chlorzoxazone

clemastine  
 clidinium  
 clonazepam  
 clorazepate  
 clozapine  
 codeine  
 codeine/guaifenesin  
 codeine/guaifenesin/pseudoephedrine  
 codeine/phenylephrine/promethazine  
 codeine/promethazine  
 cyclizine  
 cyclobenzaprine  
 cyproheptadine

**D**

dantrolene  
 dexbrompheniramine/hydrocodone/phenylephrine  
 dexbrompheniramine/pseudoephedrine  
 dexchlorpheniramine  
 dexchlorpheniramine/dextromethorphan/phenylephrine  
 dexchlorpheniramine/dextromethorphan/pseudoephedrine  
 dextromethorphan/diphenhydramine/phenylephrine  
 dextromethorphan/promethazine  
 diazepam  
 dichloralphenazone  
 dihydrocodeine/guaifenesin/pseudoephedrine  
 dimenhydrinate  
 diphenhydramine  
 diphenhydramine/hydrocodone/phenylephrine  
 diphenhydramine/phenylephrine  
 diphenhydramine/pseudoephedrine  
 divalproex sodium  
 doxacurium  
 dronabinol  
 droperidol  
 dyphylline/ephedrine/guaifenesin/phenobarbital

**E**

ephedrine/phenobarbital/potassium iodide/theophylline  
 ephedrine/hydroxyzine/theophylline  
 ephedrine/phenobarbital/theophylline  
 ethosuximide

**F**

fentanyl  
 fluoxetine/olanzapine  
 fluphenazine

**G**

gabapentin  
 guaifenesin/hydrocodone  
 guaifenesin/hydrocodone/pheniram/phenylpropanolamine/  
 pyrilamin  
 guaifenesin/hydrocodone/pheniramine/phenylephrine/  
 phenylpropanolamine  
 guaifenesin/hydrocodone/phenylephrine  
 guaifenesin/hydrocodone/pseudoephedrine  
 guaifenesin/phenylephrine/pyrilamine

**H**

haloperidol  
 homatropine/hydrocodone  
 hydrocodone  
 hydrocodone/ibuprofen  
 hydrocodone/pheniramine/phenylephrine/  
 phenylpropanolamine/pyrilamine  
 hydrocodone/phenylephrine  
 hydrocodone/phenylephrine/pyrilamine  
 hydrocodone/phenylephrine/pyrilamine  
 hydrocodone/phenylpropanolamine  
 hydrocodone/potassium guaiaacolsulfonate  
 hydrocodone/pseudoephedrine  
 hydrocodone/pseudoephedrine/triprolidine  
 hydromorphone  
 hydroxyzine  
 hyoscyamine/phenobarbital

**L**

lamotrigine  
 levetiracetam  
 lithium  
 lorazepam  
 loxapine

**M**

meclizine  
 meperidine  
 meperidine/promethazine  
 mephobarbital  
 mesoridazine  
 metaxalone  
 methadone  
 methdilazine  
 methocarbamol  
 methotrimeprazine  
 methsuximide  
 metoclopramide  
 mivacurium  
 morphine

**N**

nabilone

**O**

olanzapine  
 opium  
 orphenadrine  
 oxazepam  
 oxcarbazepine  
 oxycodone  
 oxymorphone

**P**

pancuronium  
 pentazocine  
 perphenazine  
 phenindamine

pheniramine  
pheniramine/phenylephrine nasal  
pheniramine/phenylpropanolamine/phenyltoloxamine/  
pyrilamine  
pheniramine/phenylpropanolamine/pyrilamine  
pheniramine/phenyltoloxamine/pseudoephedrine/pyrilamine  
pheniramine/phenyltoloxamine/pyrilamine  
phenobarbital  
phenylephrine/promethazine  
phenylephrine/pyrilamine  
phenyltoloxamine  
phenytoin  
pramipexole  
pregabalin  
prochlorperazine  
prochlorperazine  
promazine  
promethazine  
propiomazine  
propoxyphene  
pyrilamine

## R

risperidone  
ropinirole

## S

scopolamine  
succinylcholine

## T

tapentadol  
thiethylperazine  
thioridazine  
tiagabine  
tizanidine  
topiramate  
tramadol  
trifluoperazine  
triflupromazine  
trimeprazine  
trimethobenzamide  
tripelennamine  
triprolidine  
tubocurarine

## V

valproic acid

## Z

ziprasidone  
zonisamide
